# Supplementary material for: Hepatogenic Potential and Liver Regeneration Effect of Human Liver-derived Mesenchymal-Like Stem Cells
Source: Cells. 2020 Jun 22;9(6):1521. doi: 10.3390/cells9061521 (PMC7348751; doi:10.3390/cells9061521)
Supplement: Supplementary file 1 [file cells-09-01521-s001.pdf]

# Supplementary Data

## 1. Supplementary Figures

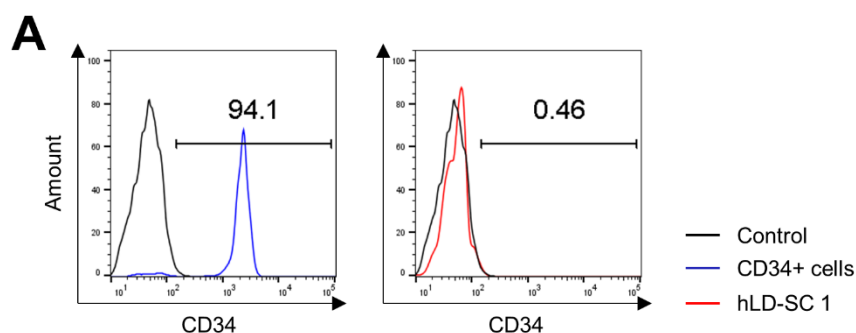

**Figure S1.** Flow cytometry histogram profiles of CD34-positive cells. (A) Flow cytometry measurement of CD34-positive cells and hLD-SC 1.

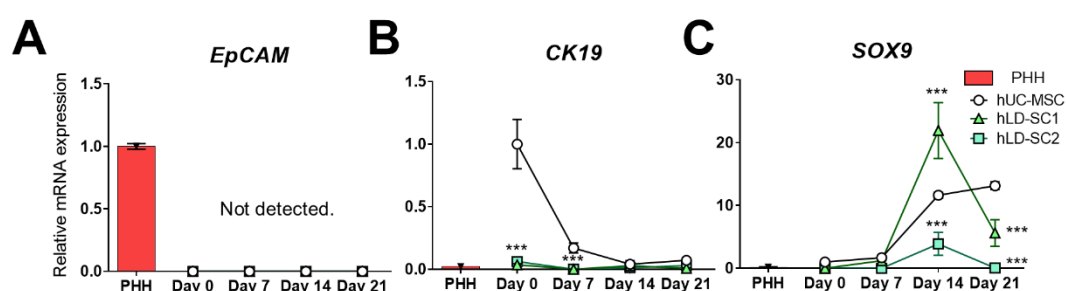

**Figure S2.** Relative normalized expression of *EpCAM*, *CK19*, and *SOX9*. (A – C) Expression levels of (A) *EpCAM*, (B) *CK19*, and (C) *SOX9* were normalized to *GAPDH* and compared to the expression levels of hUC-MSCs on differentiation day 0. Two-way analysis of variance (ANOVA) was used for statistical analysis, and *P*-values of hLD-SCs were compared to hUC-MSCs on differentiation days 0, 7, 14, and 21. *p*-values with  $< 0.05$  were considered significant.  $n = 4$ . \*,  $p < 0.05$ ; \*\*,  $p < 0.01$ ; \*\*\*,  $p < 0.001$ .

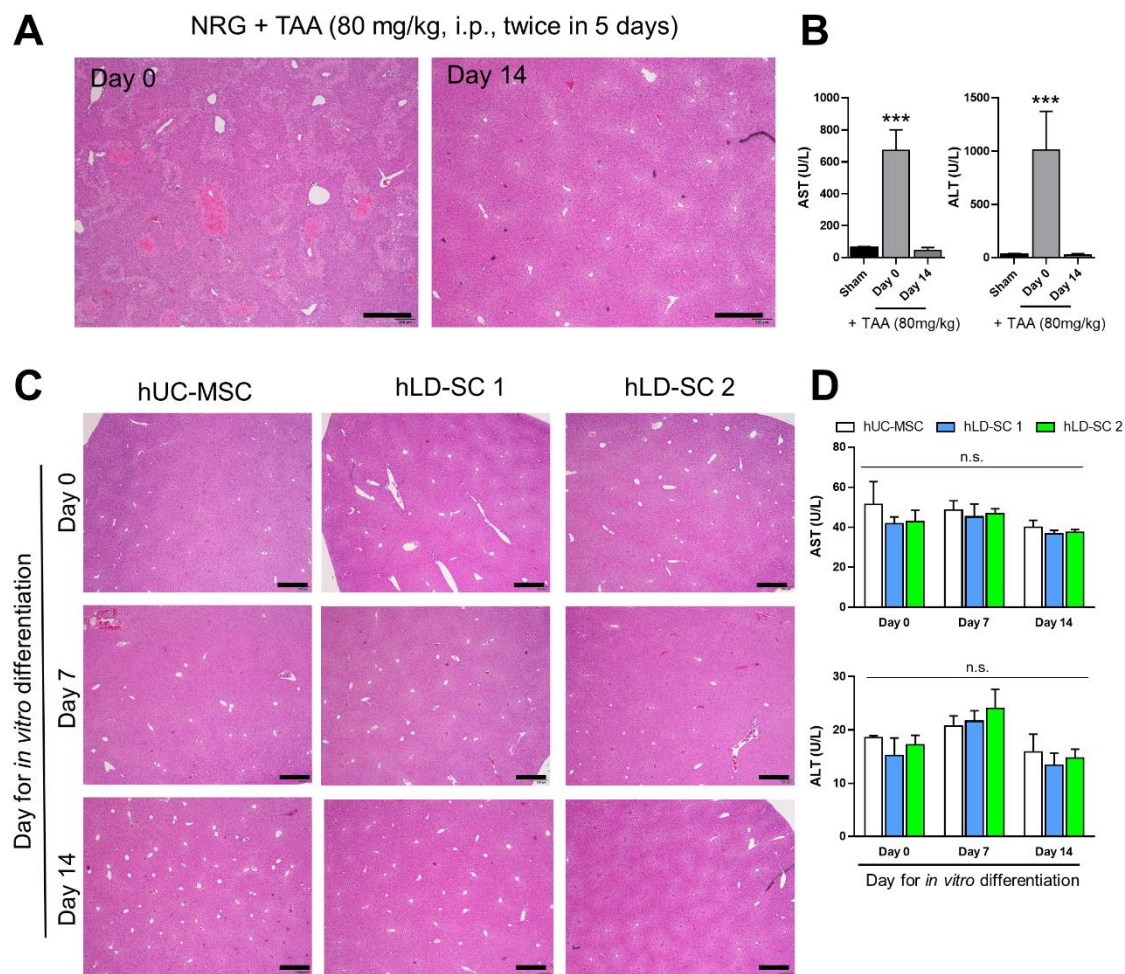

**Figure S3.** Thioacetamide (TAA)-induced acute liver injury was mostly recovered within 14 days. (A) Hematoxylin and eosin (H&E) staining for liver histology. 40× magnification; Scale bar, 500  $\mu$ m. (B) Serum levels of aspartate transaminase (AST) and alanine transaminase (ALT) on day 0 and day 14 after TAA (80 mg/kg) administration.  $P$ -values  $< 0.05$  were considered significant.  $n = 3$ . \*\*\*,  $p < 0.001$ . (C) H&E staining results for hUC-MSC- and hLD-SC-transplanted mice on day 14. 40× magnification; Scale bar, 500  $\mu$ m. (D) Serum levels of AST and ALT on day 14 after cell transplantation.  $p$ -values  $< 0.05$  were considered significant.  $n = 3$  for sham;  $n = 4$  for other groups. n.s., not significant.

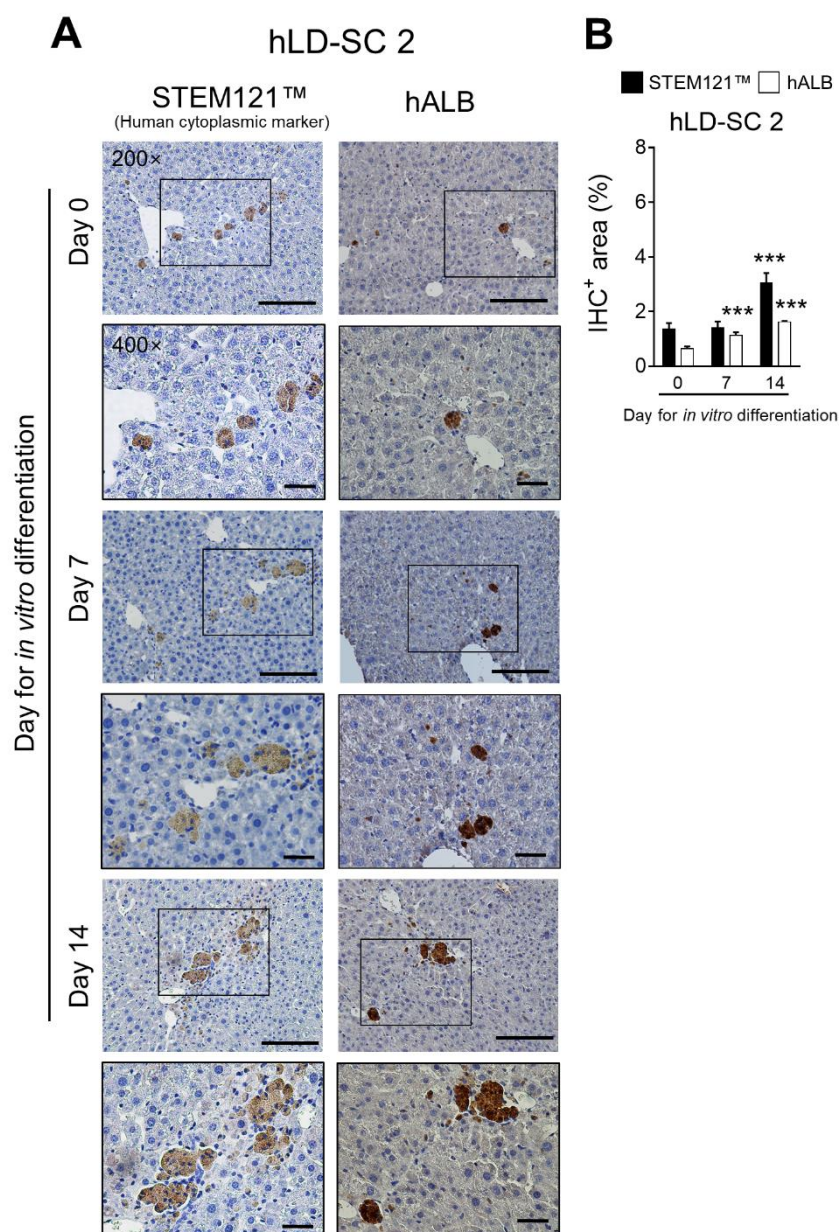

**Figure S4.** Observation of spontaneous hepatocyte differentiation and maturation of hLD-SC 2 in thioacetamide (TAA)-induced acute liver injury mice. (A) Representative images of human STEM121<sup>TM</sup> (human cytoplasmic marker) and human albumin (hALB) immunohistochemistry in mice restored 14 days after stem cell transplantation. Scale bar, 100  $\mu$ m for 200 $\times$  magnification; 50  $\mu$ m for 400 $\times$  magnification. (B) STEM121<sup>TM</sup> and hALB-positive area (%) of hUC-MSCs and hLD-SCs are expressed as average  $\pm$  standard deviation and each value was compared to day 0. *P*-values < 0.05 were considered significant. *n* = 4. \*, *p* < 0.05; \*\*, *p* < 0.01; \*\*\*, *p* < 0.001.

## 2. Supplementary Table

**Table S1.** Primer details for *EpCAM*, *CK19*, and *SOX9*.

| Gene Name           | Primer Sequences (5' to 3')                                    |
|---------------------|----------------------------------------------------------------|
| Human               |                                                                |
| <i>EpCAM</i>        | Forward: GAACAATGATGGGCTTTATG<br>Reverse: TGAGAATTCAGGTGCTTTTT |
| <i>CK19 (KRT19)</i> | Forward: TCCGAACCAAGTTTGAGACG<br>Reverse: CCCTCAGCGTACTGATTTC  |
| <i>SOX9</i>         | Forward: GAGGAAGTCGGTGAAGAACG<br>Reverse: ATCGAAGGTCTCGATGTTGG |

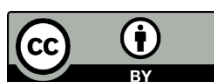

© 2020 by the authors. Licensee MDPI, Basel, Switzerland. This article is an open access article distributed under the terms and conditions of the Creative Commons Attribution (CC BY) license (<http://creativecommons.org/licenses/by/4.0/>).
